# Supplementary material for: Biochemical characterization of the first step in sulfonolipid biosynthesis in Alistipes finegoldii
Source: PubMed Central journal article supplement (PMC9304779; doi:10.1016/j.jbc.2022.102195), 2022-06-25
Supplement: mmc1.pdf [file mmc1.pdf]

# Supplemental Materials

## Biochemical characterization of the first step in sulfonolipid biosynthesis in *Alistipes fingoldii*

Christopher D. Radka, Darcie J. Miller, Matthew W. Frank, Charles O. Rock

Figures S1-S5.

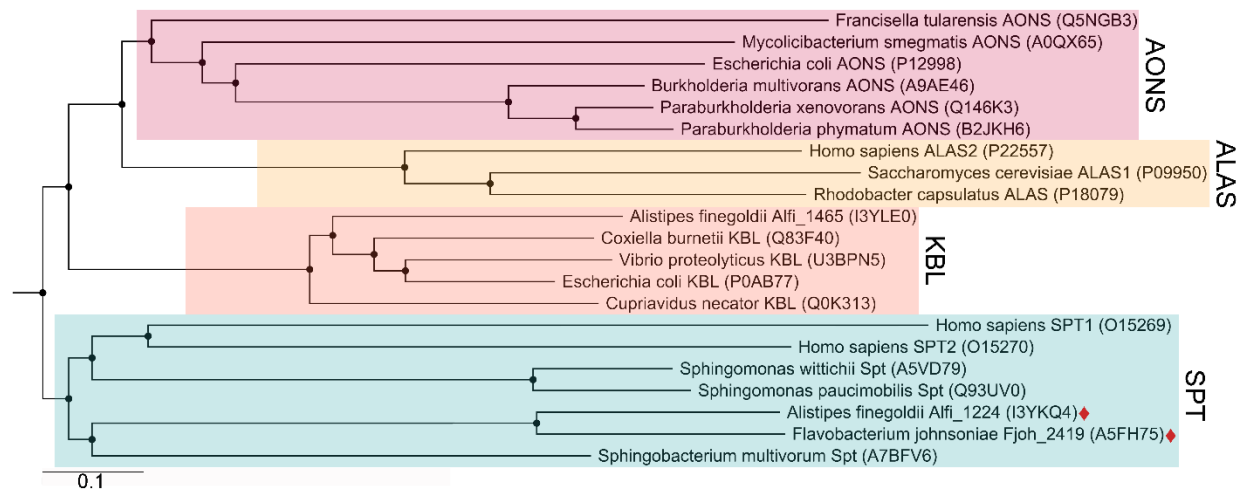

**Figure S1. Evolutionary relationship between AOS family members.** The AOS family has four main groups that diverged early in evolution. AONS, 8-amino-7-oxononanoate synthase; ALAS, aminolevulinic acid synthase; KBL, 2-amino-3-ketobutrate coenzyme A ligase; SPT, serine palmitoyltransferase. Red diamonds indicate that genes encoding Sula (*alfi\_1224* and *fjoh\_2419*) lie within the SPT group. The Uniprot accession code for each sequence is shown in parenthesis, and the phylogenetic tree was constructed in CLC Main Workbench (version 20.0).

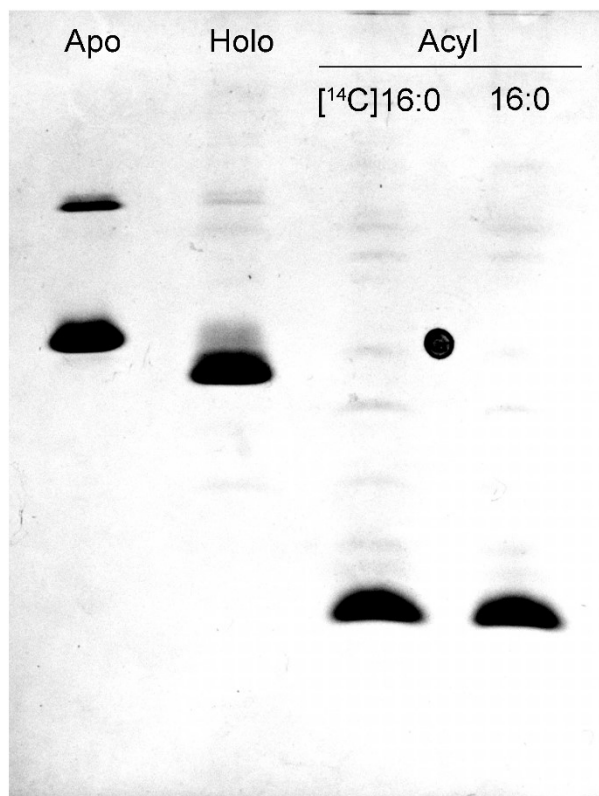

**Figure S2. Acyl-ACP and [<sup>14</sup>C]acyl-ACP synthesis.** Conversion of apo-ACP to ACP and then to acyl-ACP was confirmed by 2.5 M urea, 15% w/v acrylamide native gel electrophoresis.

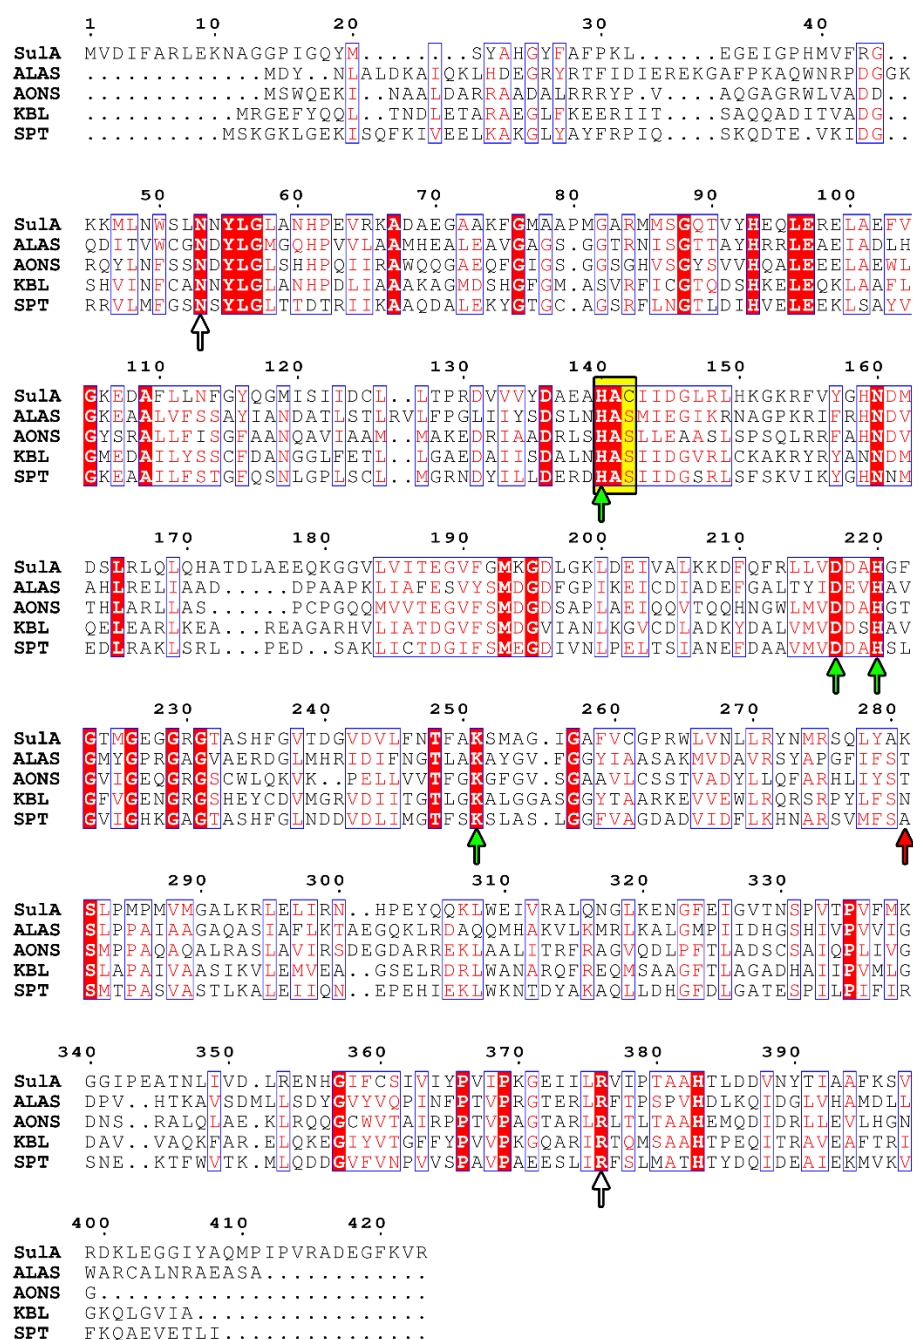

**Figure S3. PLP binding sites in the AOS enzyme superfamily.** Alignment of the SulA amino acid sequence versus sequences from structurally confirmed AOS enzymes deposited in the Protein Data Bank for serine palmitoyltransferase (SPT; PDBID: 3A2B), 8-amino-7-oxononanoate synthase (AONS; PDBID: 1DJE), 5-aminolevulinic acid synthase (ALAS; PDBID: 2BWN), and 2-amino-3-ketobutyrate CoA ligase (KBL; PDBID: 1FC4). Conserved PLP-binding residues are identified by green arrows, the conserved HAS/C PLP-binding motif is identified by yellow highlight, the white arrows indicate conserved active site residues that are implicated in the condensation reaction and the SulA-specific Lys281 is identified by the red arrow. Amino acid sequences were aligned using Clustal Omega (<https://www.ebi.ac.uk/Tools/msa/clustalo/>) and the ESPrnt program (<http://endscript.ibcp.fr/ESPrnt/ESPrnt/index.php>) was used to visualize sequence conservation. Sequence numbering is assigned to SulA.

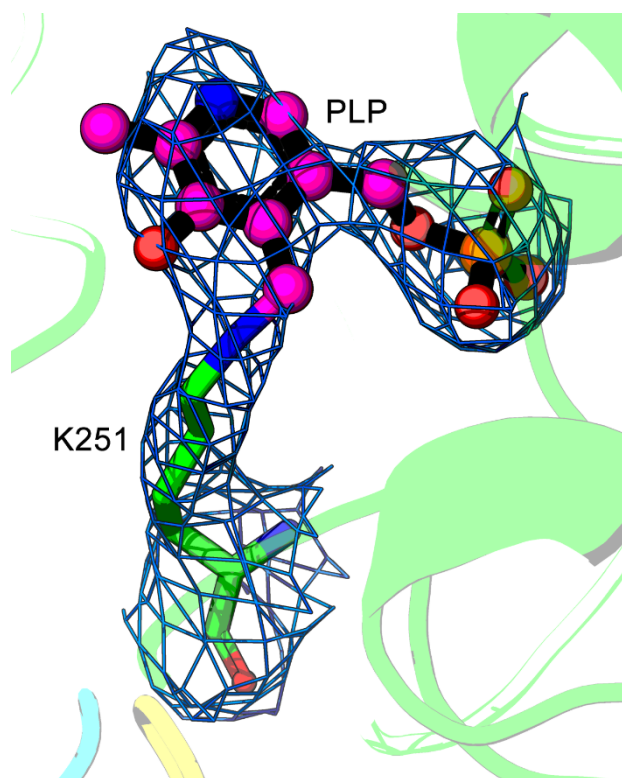

**Figure S4. Contiguous electron density of the covalent internal aldimine complex.** Electron density calculated from a  $2mF_o-DF_c$  map contoured at  $1\sigma$  (blue mesh) shows contiguous electron density across PLP and Lys251.

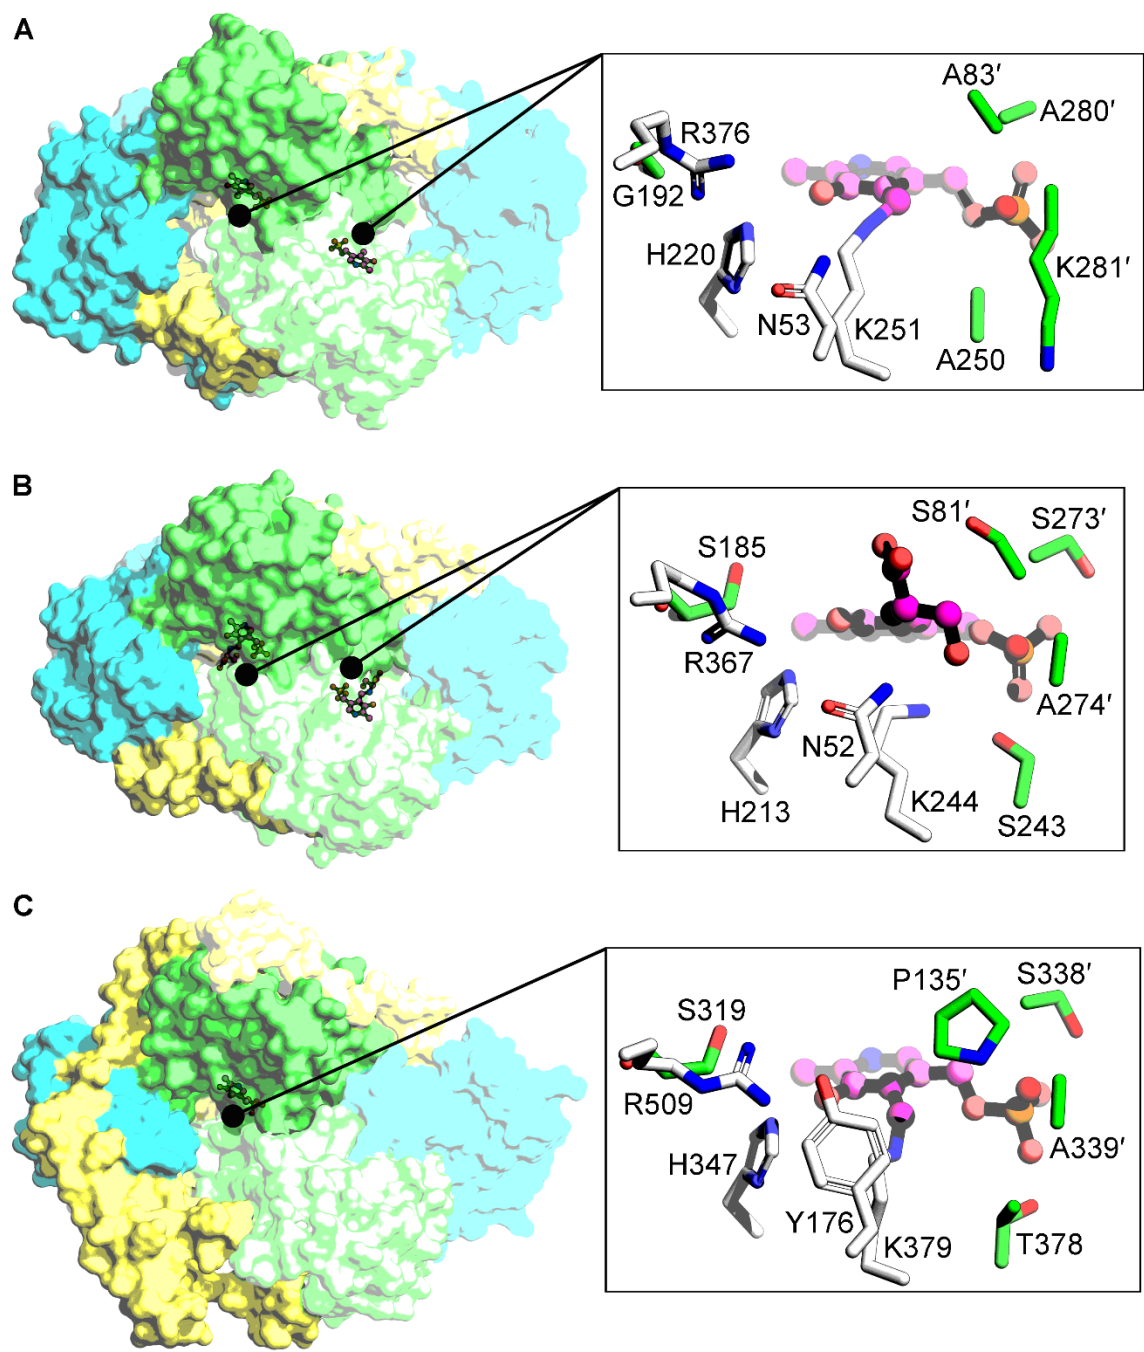

**Figure S5. Active site comparison of the serine palmitoyltransferase (Spt) enzyme family.** The external surface of *A*, *Alistipes fingoldii* Sula internal aldimine, *B*, *Spingobacterium multivorum* Spt external aldimine (PDBID: 3A2B), and *C*, *Homo sapiens* Spt internal aldimine (PDBID: 7K0I). The Sula homodimer is structurally similar to the *S. multivorum* Spt homodimer and *H. sapiens* Spt heterodimer with R.M.S.D. values of 1.50 and 1.34 Å respectively. Electrostatic surface visualization is shown from -5 kT/e (red) to +5 kT/e (blue) of the solvent-accessible surface, calculated and displayed by APBS (63). The zoomed-in image shows residues at identical positions within the active sites of *A*, *B*, and *C*. Residues common to Spt enzymes are shown in white and other active site residues are shown in green. Residues marked with a prime symbol are from the opposite protomer.
